# Supplementary material
Source: Springer Nature journal article supplement (https://www.springermedizin.de/resource/supplementary/12885_2012_3723_MOESM3_ESM.pdf/9465940)
Supplement: MOESM3 [file 9465940]

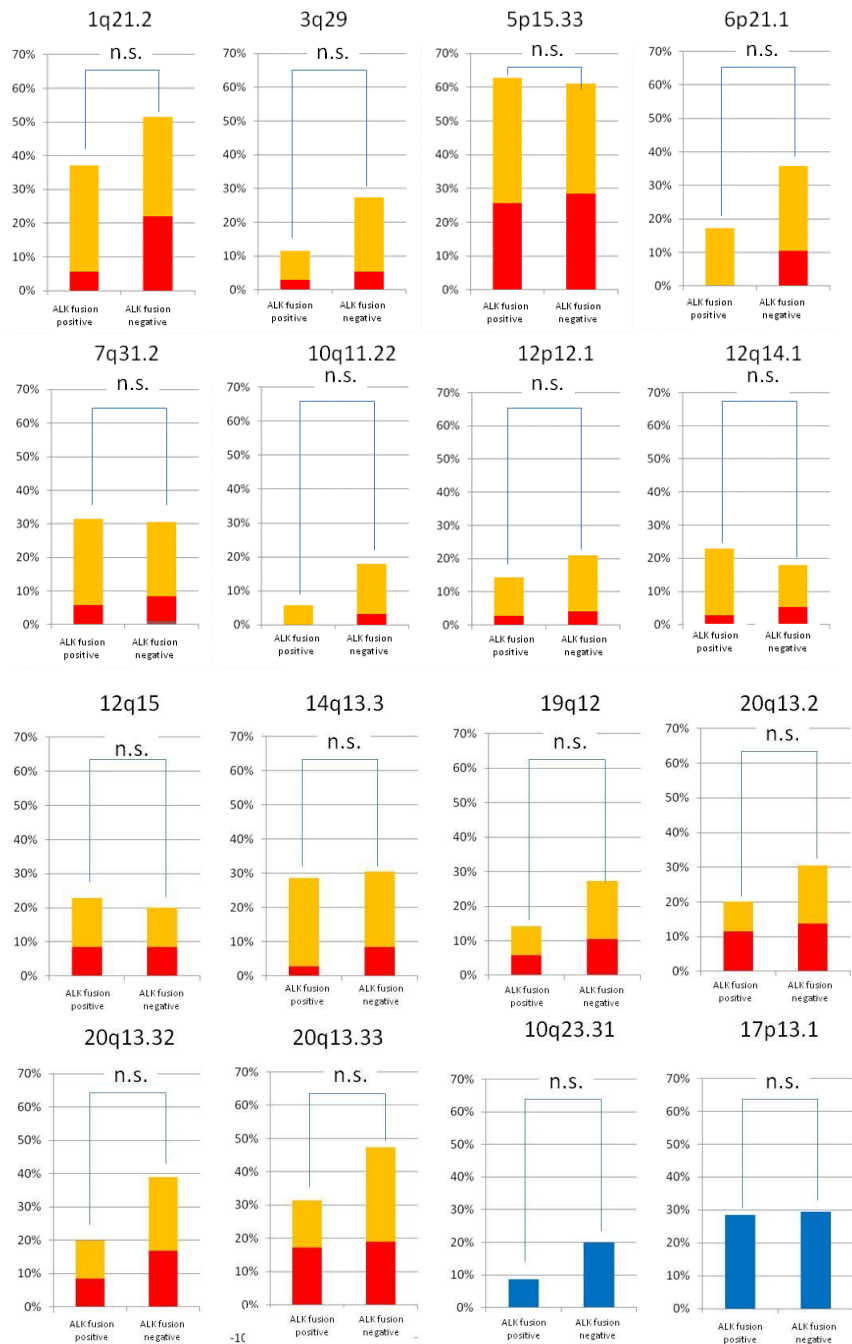

Ninomiya et al. Supplementary Fig S2
